# Supplementary material for: Screening of the Toxicity of Polystyrene Nano- and Microplastics Alone and in Combination with Benzo(a)pyrene in Brine Shrimp Larvae and Zebrafish Embryos
Source: MDPI journal article supplement (doi:10.3390/nano12060941), 2022-03-12
Supplement: s1 [file s1]

Supplementary Materials

# Screening of the Toxicity of Polystyrene Nano- and Microplastics Alone and in Combination with Benzo(a)pyrene in Brine Shrimp Larvae and Zebrafish Embryos

Ignacio Martínez-Álvarez <sup>1,2</sup>, Karyn Le Menach <sup>2</sup>, Marie-Hélène Devier <sup>2</sup>, Miren P. Cajaraville <sup>1</sup>, Hélène Budzinski <sup>2</sup> and Amaia Orbea <sup>1,\*</sup>

<sup>1</sup> CBET Research Group, Department of Zoology and Animal Cell Biology, Research Centre for Experimental Marine Biology and Biotechnology PiE and Science and Technology Faculty, University of the Basque Country (UPV/EHU), E-48940 Leioa, Spain; ignacio.martinez@ehu.eus (I.M.-Á.); miren.p.cajaraville@ehu.eus (M.P.C.)

<sup>2</sup> University of Bordeaux, UMR 5805 CNRS, EPOC, Laboratory of Physico- and Toxico-Chemistry of the Environment, F-33405, Talence Cedex, France.  
karyn.le-menach@u-bordeaux.fr (K.L.M.); marie-helene.devier@u-bordeaux.fr (M.-H.D.);  
helene.budzinski@u-bordeaux.fr (H.B.)

\* Correspondence: amaia.orbea@ehu.eus; Tel.: +34-946-012-735

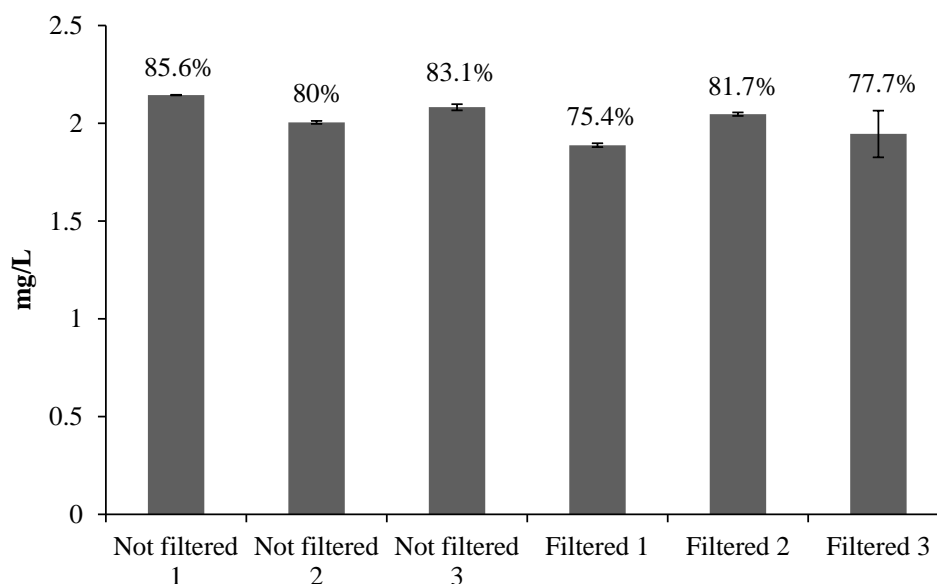

**Figure S1-** Measured concentration from a nominal concentration of 2.51 mg/L or  $5.10^4$  particles/mL of 4.5 µm MPs using a cell counter before and after filtration using a polyethersulfone filter (0.45 µm filter pore). Bars represent the mean of 3 instrumental replicates with their corresponding standard deviation. The percentage of MP measured from the nominal concentration is given above each bar.

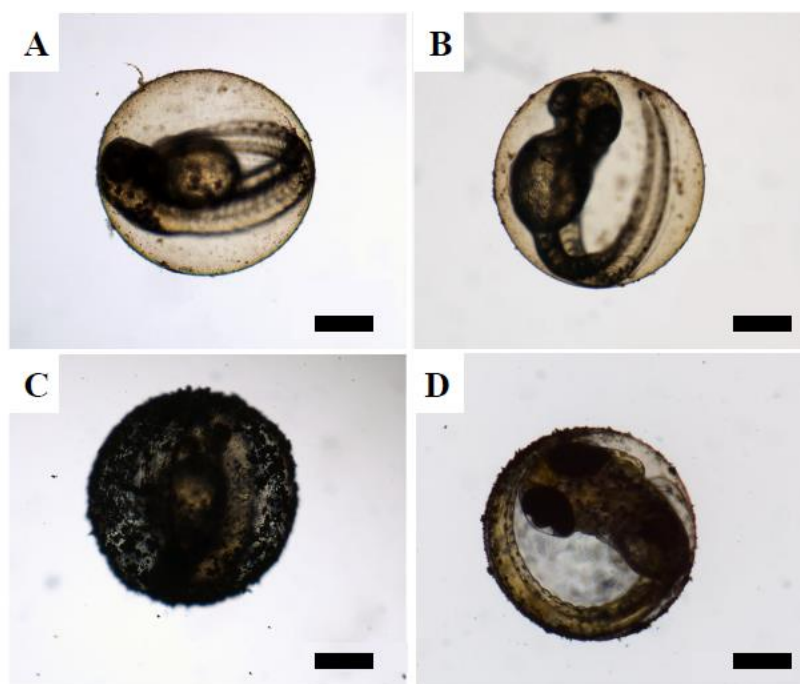

**Figure S2.** Micrographs of zebrafish embryos exposed to similar masses of plastics of different sizes. A) 48 hpf embryo exposed to 6.87 mg/L of 50 nm NPs; B) 48 hpf embryo exposed to 6.87 mg/L of 500 nm NPs; C) 48 hpf embryo exposed to 5.01 mg/L of 4.5  $\mu$ m MPs; D) non-hatched 120 hpf alive embryo exposed to 5.01 mg/L of 4.5  $\mu$ m MPs-B(a)P. Scale bars: 100  $\mu$ m.

**Table S1-** Effect on survival (%) of the exposure of 24 hph and 48 hph brine shrimp larvae to DMSO for 24 h and 48 h.

| Concentration<br>(v/v) | 24 hph |      | 48 hph |      |
|------------------------|--------|------|--------|------|
|                        | 24 h   | 48 h | 24 h   | 48 h |
| 0                      | 100    | 97   | 100    | 97   |
| 0.01%                  | 97     | 93   | 97     | 93   |
| 0.10%                  | 100    | 93   | 100    | 100  |

**Table S2-** Odd ratio values indicating the risk of death (immobilisation) for brine shrimp larvae exposed to MPs alone or in combination with B(a)P.

| Treatment test        |                | Treatment for comparison | Conc. (mg/L) | Odd ratio            | Confidence interval (5%, 95%)              | <i>p</i> value |
|-----------------------|----------------|--------------------------|--------------|----------------------|--------------------------------------------|----------------|
| 500 nm NPs-B(a)P      | 24 hph<br>48 h | Control                  | 0.00034      | $1.94 \cdot 10^{54}$ | $7.83 \cdot 10^{50} - 4.78 \cdot 10^{57}$  | 0              |
|                       |                |                          | 0.00069      | $1.94 \cdot 10^{54}$ | $7.83 \cdot 10^{50} - 2.71 \cdot 10^{271}$ | 0              |
|                       |                |                          | 6.87         | 1.422                | 1.179 - 1.715                              | 0.000          |
|                       | 48 hph<br>48 h | Control                  | 0.00034      | $1.94 \cdot 10^{54}$ | $7.83 \cdot 10^{50} - 2.72 \cdot 10^{271}$ | 0              |
| B(a)P                 | 24 hph<br>48 h | Control                  | 0.1          | $2.82 \cdot 10^8$    | $25.257 - 3.16 \cdot 10^{15}$              | 0.008          |
|                       |                |                          | 0.5          | 196                  | 7.939 - 4838.811                           | 0.000          |
|                       |                |                          | 1            | 10.706               | 2.148 - 53.348                             | 0.001          |
|                       |                |                          | 5            | 1.741                | 1.263 - 2.399                              | 0.000          |
|                       |                |                          | 10           | 1.250                | 1.064 - 1.469                              | 0.002          |
| 500 nm NPs-B(a)P      | 24 hph<br>48 h | 500 nm NPs               | 0.00069      | 9.333                | 1.866 - 46.683                             | 0.001          |
|                       |                |                          | 6.87         | 24.182               | 4.808 - 121.625                            | 0.000          |
|                       | 48 hph<br>48 h | 500 nm NPs               | 0.00034      | 25.375               | 3.050-211.104                              | 0.000          |
|                       |                |                          | 0.687        | 22.176               | 2.661-184.798                              | 0.000          |
|                       |                |                          | 6.87         | 19.333               | 2.313-161.565                              | 0.000          |
| 4.5 $\mu$ m MPs-B(a)P | 24 hph<br>48 h | 4.5 $\mu$ m MPs          | 0.025        | 19.333               | 2.313 - 161.565                            | 0.000          |
|                       |                |                          | 0.501        | 10.706               | 2.148 - 53.348                             | 0.001          |
|                       |                |                          | 50.1         | 16.789               | 2.001 - 140.898                            | 0.001          |
| 4.5 $\mu$ m MPs-B(a)P | 24 hph<br>48 h | 500 nm NPs-B(a)P         | 5.01, 6.87   | 0.706                | 0.539 - 0.924                              | 0.009          |
|                       | 48 hph<br>48 h | 500 nm NPs-B(a)P         | 0.501, 0.687 | 0.617                | 0.436 - 0.875                              | 0.003          |
|                       |                |                          | 5.01, 6.87   | 0.639                | 0.450 - 0.906                              | 0.006          |

**Table S3-** Odd ratio values indicating the risk of malformation in 120 hpf zebrafish embryos exposed to 4.5  $\mu\text{m}$  MPs alone or in combination with B(a)P or to B(a)P alone.

| Treatment test              | Treatment for comparison | Conc. (mg/L) | Odd ratio | Confidence interval (5%, 95%) | <i>p</i> value |
|-----------------------------|--------------------------|--------------|-----------|-------------------------------|----------------|
| 4.5 $\mu\text{m}$ MPs-B(a)P | Control                  | 50.1         | 1.045     | 1.019 - 1.072                 | 0.0001         |
| B(a)P                       | Control                  | 5            | 1.373     | 1.081 - 1.744                 | 0.0063         |
|                             |                          | 10           | 1.239     | 1.098 - 1.397                 | 0.0002         |
| 4.5 $\mu\text{m}$ MPs-B(a)P | 4.5 $\mu\text{m}$ MPs    | 50.1         | 5.71      | 1.82 - 20.66                  | 0.0000         |

**Table S4.** Effects of 120 h DMSO exposure on developmental parameters of zebrafish embryos.

| Concentration (% v/v) | % survival | hatching time (h) | % malformed embryos |
|-----------------------|------------|-------------------|---------------------|
| 0.0                   | 100        | 70.0              | 8.3                 |
| 0.01                  | 100        | 68.7              | 10.0                |
| 0.1                   | 100        | 69.3              | 13.3                |
